# Supplementary material for: A New Method to Sort Differentiating Osteoclasts into Defined Homogeneous Subgroups
Source: MDPI journal article supplement (doi:10.3390/cells11243973), 2022-12-08
Supplement: s1 [file s1]

Supplementary Figure S1

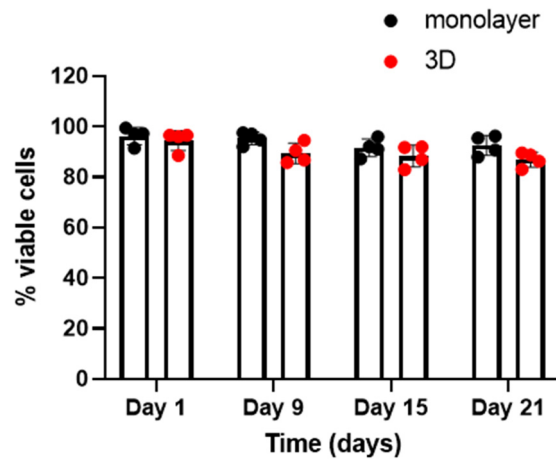

**Figure S1.** Cell viability immediately after release from monolayer or 3D culture. Days indicate duration of differentiation pre-release. Viability is expressed as a percentage of total cell number, assessed by flow cytometry using the eF780 viability dye.  $p < 0.05$ .
